# Supplementary material
Source: Copernicus journal article supplement (doi:10.5194/bg-23-3981-2026)
Supplement: Supplementary file 1 [file bg-23-3981-2026-supplement.pdf]

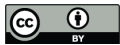

*Supplement of*

## **Point-scale organic-matter decomposition in streambeds is weakly associated with reach-scale respiration**

**James C. Stegen et al.**

*Correspondence to:* James C. Stegen (James.Stegen@pnnl.gov)

The copyright of individual parts of the supplement might differ from the article licence.

**Table S1.** Regression coefficients for LASSO results explaining variation in K<sub>dd</sub> and K<sub>cd</sub>. All predictor variables were cube root transformed to reduce the impact of high leverage points in the regression analysis and standardized as z-scores to enable direct comparison of the regression coefficients. The LASSO regressions were performed over 100 seeds. Reported mean regression coefficients ( $\beta$ ) and R<sup>2</sup> were averaged across the 100 seeds. Normalized regression coefficients were calculated by dividing each  $\beta$  coefficient by the maximum  $\beta$  coefficient in each seed. Standard deviation (sd) was calculated for each coefficient over the 100 seeds. Coefficient of variation (cv) was calculated as standard deviation divided by the mean.

| Response Variable |            | Predictor                   | Mean $\beta$   | sd        | cv     |         |        |
|-------------------|------------|-----------------------------|----------------|-----------|--------|---------|--------|
| K <sub>dd</sub>   | Normalized | Water TDN                   |                | 1         | 0      |         |        |
|                   |            | D50                         | -0.699         | 0.0867    | -0.124 |         |        |
|                   |            | Calcium                     | 0.46           | 0.00814   | 0.018  |         |        |
|                   |            | Sulfate                     | 0.36           | 0.094     | 0.261  |         |        |
|                   |            | Percent N                   | -0.125         | 0.108     | -0.868 |         |        |
|                   |            | Sediment TN                 | 0.0717         | 0.0632    | 0.881  |         |        |
|                   |            | Drainage Area               | 0.000356       | 0.00123   | 3.46   |         |        |
|                   |            | Iron                        | 0              | 0         |        |         |        |
|                   |            | Sediment Respiration        | 0              | 0         |        |         |        |
|                   |            | Total Ecosystem Respiration | 0              | 0         |        |         |        |
|                   |            | Water Column Respiration    | 0              | 0         |        |         |        |
|                   |            | Gross Primary Production    | 0              | 0         |        |         |        |
|                   |            | Slope                       | 0              | 0         |        |         |        |
|                   |            | Discharge                   | 0              | 0         |        |         |        |
|                   |            | Velocity                    | 0              | 0         |        |         |        |
|                   |            | Percent Forest Cover        | 0              | 0         |        |         |        |
|                   |            | Aridity                     | 0              | 0         |        |         |        |
|                   |            | Percent Agricultural Cover  | 0              | 0         |        |         |        |
|                   |            | Percent Shrub Cover         | 0              | 0         |        |         |        |
|                   |            | Minimum Elevation           | 0              | 0         |        |         |        |
|                   |            | TSS                         | 0              | 0         |        |         |        |
|                   |            | Depth                       | 0              | 0         |        |         |        |
|                   |            | Water NPOC                  | 0              | 0         |        |         |        |
|                   |            | Sediment NPOC               | 0              | 0         |        |         |        |
|                   |            | Percent C                   | 0              | 0         |        |         |        |
|                   |            | Chloride                    | 0              | 0         |        |         |        |
|                   |            | Respiration (Lab)           | 0              | 0         |        |         |        |
|                   |            | Percent Sand                | 0              | 0         |        |         |        |
|                   |            | K <sub>dd</sub>             | Not Normalized | Water TDN | 0.262  | 0.00359 | 0.014  |
|                   |            |                             |                | D50       | -0.184 | 0.0246  | -0.134 |

|                 |            |                             |          |          |        |
|-----------------|------------|-----------------------------|----------|----------|--------|
|                 |            | Calcium                     | 0.121    | 0.0026   | 0.022  |
|                 |            | Sulfate                     | 0.0948   | 0.0254   | 0.268  |
|                 |            | Percent N                   | -0.0329  | 0.0285   | -0.868 |
|                 |            | Sediment TN                 | 0.0189   | 0.0167   | 0.882  |
|                 |            | Drainage Area               | 9.41E-05 | 0.000326 | 3.46   |
|                 |            | Iron                        | 0        | 0        |        |
|                 |            | Sediment Respiration        | 0        | 0        |        |
|                 |            | Total Ecosystem Respiration | 0        | 0        |        |
|                 |            | Water Column Respiration    | 0        | 0        |        |
|                 |            | Gross Primary Production    | 0        | 0        |        |
|                 |            | Slope                       | 0        | 0        |        |
|                 |            | Discharge                   | 0        | 0        |        |
|                 |            | Velocity                    | 0        | 0        |        |
|                 |            | Percent Forest Cover        | 0        | 0        |        |
|                 |            | Aridity                     | 0        | 0        |        |
|                 |            | Percent Agricultural Cover  | 0        | 0        |        |
|                 |            | Percent Shrub Cover         | 0        | 0        |        |
|                 |            | Minimum Elevation           | 0        | 0        |        |
|                 |            | TSS                         | 0        | 0        |        |
|                 |            | Depth                       | 0        | 0        |        |
|                 |            | Water NPOC                  | 0        | 0        |        |
|                 |            | Sediment NPOC               | 0        | 0        |        |
|                 |            | Percent C                   | 0        | 0        |        |
|                 |            | Chloride                    | 0        | 0        |        |
|                 |            | Respiration (Lab)           | 0        | 0        |        |
|                 |            | Percent Sand                | 0        | 0        |        |
| K <sub>cd</sub> | Normalized | Aridity                     | -0.959   | 0.0645   | -0.067 |
|                 |            | Water TDN                   | 0.805    | 0.156    | 0.193  |
|                 |            | Depth                       | 0.385    | 0.324    | 0.843  |
|                 |            | Calcium                     | 0.362    | 0.0746   | 0.206  |
|                 |            | Summed Temperature          | -0.317   | 0.256    | -0.81  |
|                 |            | Sulfate                     | 0.289    | 0.212    | 0.733  |
|                 |            | Sediment TN                 | 0.194    | 0.138    | 0.715  |
|                 |            | Iron                        | -0.169   | 0.206    | -1.22  |
|                 |            | Percent N                   | -0.166   | 0.124    | -0.747 |
|                 |            | Slope                       | 0.15     | 0.207    | 1.38   |
|                 |            | D50                         | -0.14    | 0.114    | -0.81  |
|                 |            | TSS                         | 0.114    | 0.146    | 1.28   |
|                 |            | Sediment NPOC               | -0.0948  | 0.175    | -1.84  |
|                 |            | Drainage Area               | 0.0747   | 0.073    | 0.976  |

|                 |            |                             |          |         |        |
|-----------------|------------|-----------------------------|----------|---------|--------|
|                 |            | Chloride                    | -0.0674  | 0.0714  | -1.06  |
|                 |            | Gross Primary Production    | 0.0613   | 0.139   | 2.26   |
|                 |            | Respiration (Lab)           | -0.0552  | 0.0986  | -1.78  |
|                 |            | Percent C                   | -0.0513  | 0.0828  | -1.61  |
|                 |            | Sediment Respiration        | 0.0434   | 0.0786  | 1.81   |
|                 |            | Water Column Respiration    | -0.038   | 0.0411  | -1.08  |
|                 |            | Water NPOC                  | -0.0353  | 0.0655  | -1.85  |
|                 |            | Percent Shrub Cover         | -0.0314  | 0.0439  | -1.4   |
|                 |            | Percent Agricultural Cover  | -0.0298  | 0.0547  | -1.83  |
|                 |            | Percent Forest Cover        | 0.00417  | 0.0142  | 3.42   |
|                 |            | Velocity                    | -0.00315 | 0.00737 | -2.34  |
|                 |            | Total Ecosystem Respiration | -0.00048 | 0.00167 | -3.46  |
|                 |            | Discharge                   | 0        | 0       |        |
|                 |            | Minimum Elevation           | 0        | 0       |        |
|                 |            | Percent Sand                | 0        | 0       |        |
| K <sub>cd</sub> | Not        |                             |          |         |        |
|                 | Normalized |                             |          |         |        |
|                 |            | Aridity                     | -0.444   | 0.196   | -0.442 |
|                 |            | Water TDN                   | 0.352    | 0.129   | 0.367  |
|                 |            | Depth                       | 0.228    | 0.228   | 0.998  |
|                 |            | Summed Temperature          | -0.184   | 0.171   | -0.926 |
|                 |            | Calcium                     | 0.174    | 0.105   | 0.604  |
|                 |            | Iron                        | -0.111   | 0.145   | -1.31  |
|                 |            | Sediment TN                 | 0.108    | 0.106   | 0.986  |
|                 |            | Slope                       | 0.101    | 0.144   | 1.43   |
|                 |            | Sulfate                     | 0.0987   | 0.0684  | 0.693  |
|                 |            | TSS                         | 0.0757   | 0.104   | 1.37   |
|                 |            | Percent N                   | -0.0695  | 0.046   | -0.662 |
|                 |            | Sediment NPOC               | -0.0674  | 0.125   | -1.86  |
|                 |            | D50                         | -0.047   | 0.0242  | -0.515 |
|                 |            | Chloride                    | -0.0413  | 0.0448  | -1.08  |
|                 |            | Respiration (Lab)           | -0.039   | 0.0704  | -1.8   |
|                 |            | Percent C                   | -0.0357  | 0.0588  | -1.65  |
|                 |            | Sediment Respiration        | 0.0307   | 0.0558  | 1.82   |
|                 |            | Drainage Area               | 0.0302   | 0.0294  | 0.971  |
|                 |            | Water NPOC                  | -0.0251  | 0.0469  | -1.87  |
|                 |            | Percent Agricultural Cover  | -0.0212  | 0.039   | -1.84  |
|                 |            | Percent Shrub Cover         | -0.0204  | 0.029   | -1.42  |
|                 |            | Water Column Respiration    | -0.0184  | 0.0193  | -1.05  |

|                             |          |          |       |
|-----------------------------|----------|----------|-------|
| Gross Primary Production    | 0.00604  | 0.0555   | 9.18  |
| Percent Forest Cover        | 0.00306  | 0.0105   | 3.42  |
| Velocity                    | -0.00218 | 0.00511  | -2.34 |
| Total Ecosystem Respiration | -0.00019 | 0.000649 | -3.46 |
| Discharge                   | 0        | 0        |       |
| Minimum Elevation           | 0        | 0        |       |
| Percent Sand                | 0        | 0        |       |

---

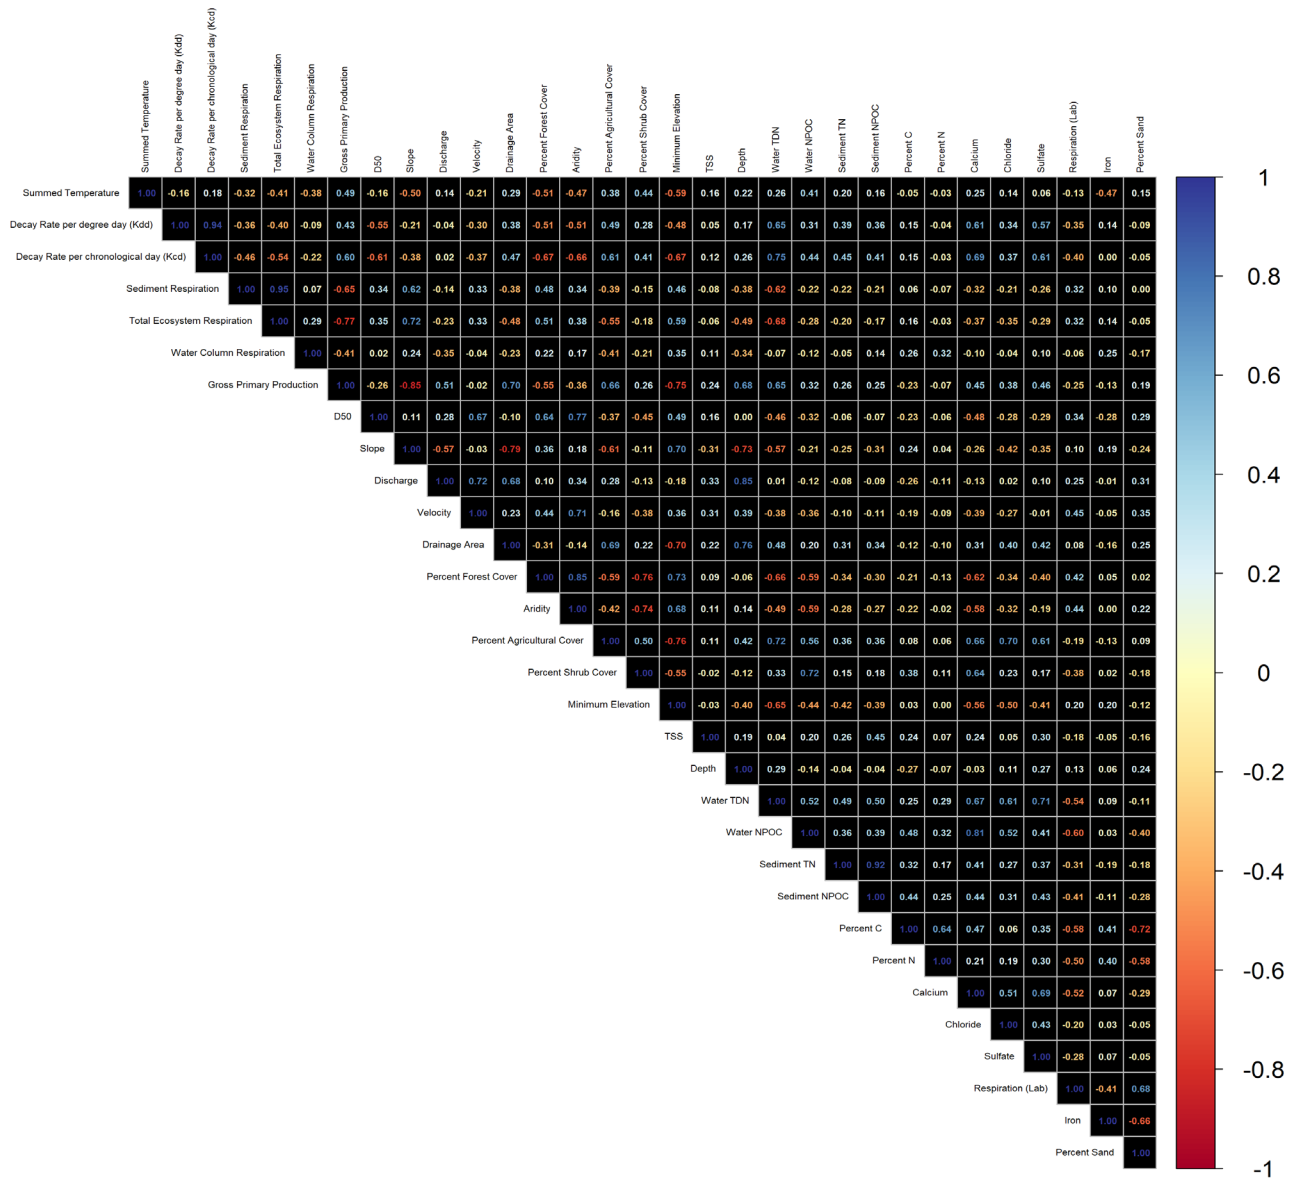

Figure S1. Pearson correlation matrix between cube-root transformed explanatory variables used in the LASSO model.
